# Supplementary material for: SZR-104, a Novel Kynurenic Acid Analogue with High Permeability through the Blood–Brain Barrier
Source: MDPI journal article supplement (doi:10.3390/pharmaceutics13010061), 2021-01-05
Supplement: s1 [file s1]

## Supplementary Material:

# SZR-104, a Novel Kynurenic Acid Analogue with High Permeability through the Blood–Brain Barrier

**Contents:** 1.  $^1\text{H}$  NMR and  $^{13}\text{C}$  NMR spectra of 39B

**8-Hydroxy-3-(morpholinomethyl)-4-oxo-1,4-dihydroquinoline-2-carboxylic acid (39B)**

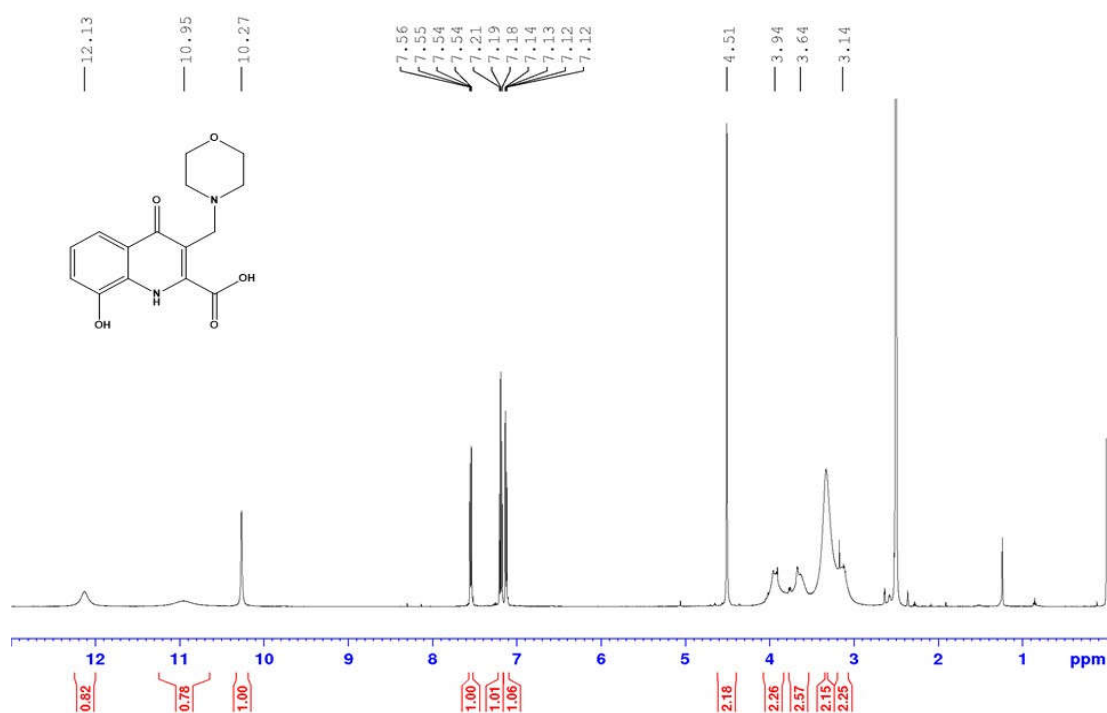

**Figure 1.**  $^1\text{H}$ -NMR spectrum of 39B.

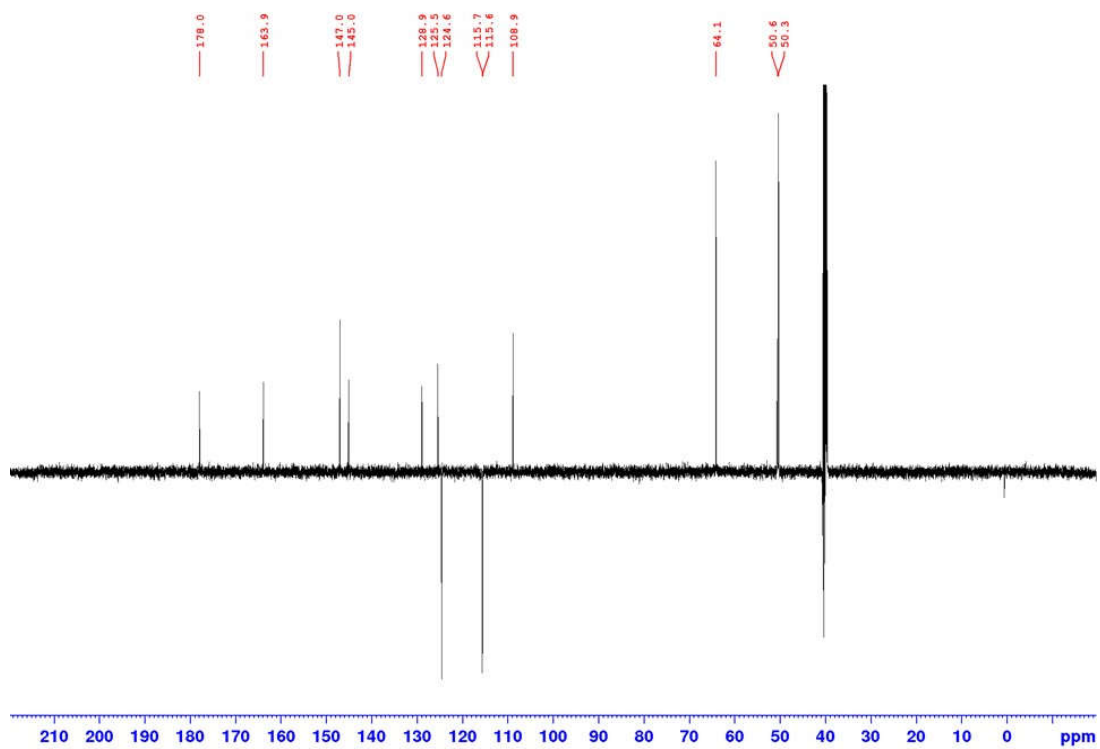

Figure S2.  $^{13}\text{C}$ -NMR spectrum of 39B
